# Supplementary material for: Nanohybrids of organo-modified layered double hydroxides and polyurethanes with enhanced mechanical, damping and UV absorption properties
Source: Royal Society of Chemistry journal article supplement (doi:10.1039/c6ra04398d), 2016-01-01
Supplement: c6ra04398d1.pdf [file c6ra04398d1.pdf]

## Supporting information for

# Nanohybrids of organo-modified layered double hydroxides and polyurethanes with enhanced mechanical, damping and UV absorption properties

Hao Zhang,<sup>a,†</sup> Jun Zhang,<sup>a,†</sup> Rongping Yun,<sup>a</sup> Zhiguo Jiang,<sup>\*a</sup> Haimei Liu,<sup>\* a,c</sup> and Dongpeng Yan<sup>\*ab</sup>

<sup>a</sup> State Key Laboratory of Chemical Resource Engineering, Beijing University of Chemical Technology, Box 98, Beijing 100029, P.R. China; yandp@bnu.edu.cn; jiangking@vip.vip.com; liuhm@shiep.edu.cn

<sup>b</sup> Key Laboratory of Theoretical and Computational Photochemistry, Ministry of Education, College of Chemistry, Beijing Normal University, Beijing 100875 P.R. China

<sup>c</sup> College of Environmental and Chemical Engineering, Shanghai University of Electric Power, Shanghai, 200090, P. R. China

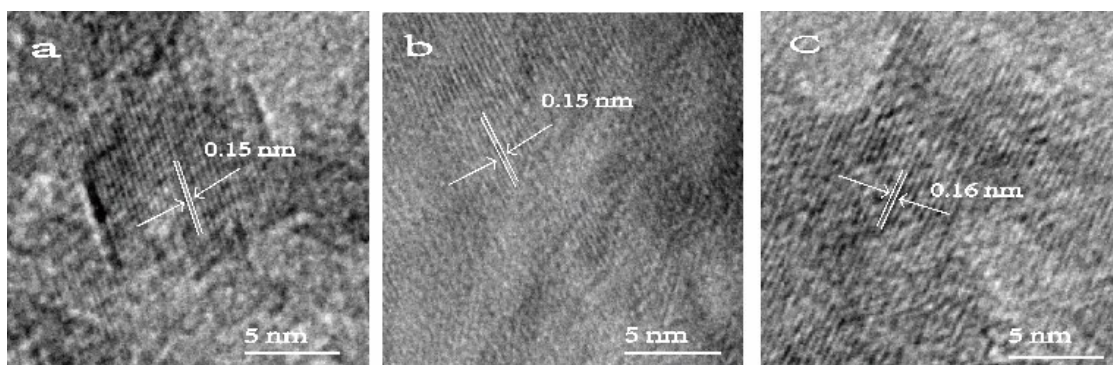

**Figure S1.** HRTEM images for (a) MgAl-NO<sub>3</sub>-LDH, (b) DS-LDH, (c) APS-DS-LDH.

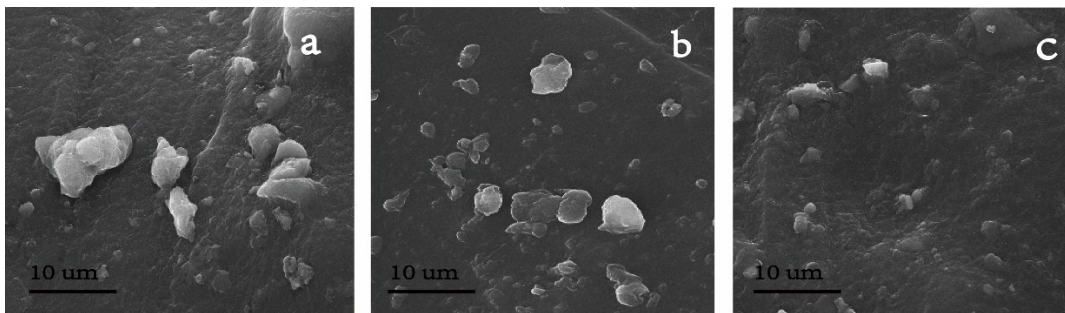

**Figure S2.** SEM images for (a) PM3, (b) PD3, (c) PA3.

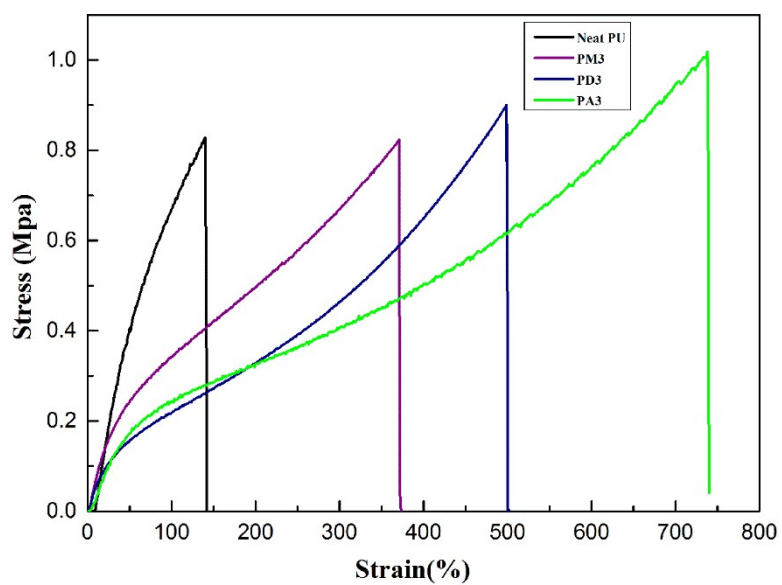

**Figure S3.** Stain-stress curves of neat PU, PM3, PD3, and PA3.
